# Supplementary material
Source: PubMed Central journal article supplement (PMC3831447)
Supplement: 1310163110_pnas.201310163SI.pdf [file 1310163110_pnas.201310163SI.pdf]

# Supporting Information

Supporting Information Corrected November 11, 2013

Malter Cohen et al. 10.1073/pnas.1310163110

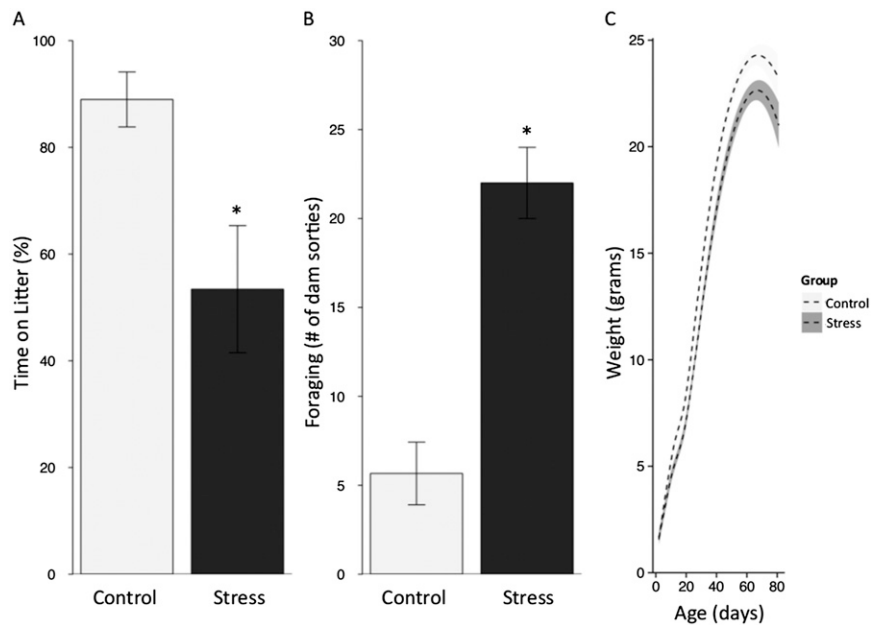

**Fig. S1.** Dam time on litter and pup weight gain across development. (A) The percentage of total time a dam spent on her litter, by experimental group [ $t = 2.74$ ;  $P < 0.05$ ;  $n = 3$  dams per experimental group (4.5 h per dam over 3 nights)]. Data are expressed as means  $\pm$  SEM. (B) The number of sorties made away from the nest by experimental group [ $t = 5.03$ ;  $P < 0.01$ ;  $n = 3$  dams per experimental group (4.5 h per dam over 3 nights)]. Data are expressed as means  $\pm$  SEM. (C) Weight gain across development by experimental group, plotted with lowest regression lines and smoothed intervals ( $t = 2.21$ ;  $P < 0.05$ ;  $n_c = 53$ ;  $n_{els} = 44$ ).

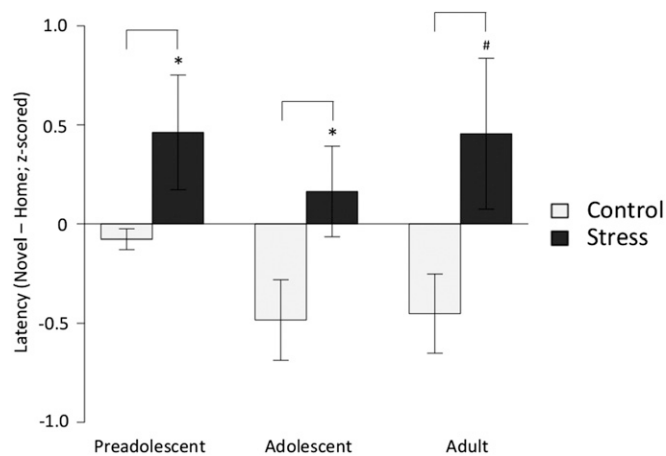

**Fig. S2.** Response latency in male mice across development. Response-latency differences between control and stressed mice across development to approach a cue in a novel cage compared with their home cage, for specific ages (preadolescent:  $t = 2.063$ ,  $P < 0.05$ ,  $n_c = 18$ ,  $n_{els} = 14$ ; adolescent:  $t = 2.116$ ,  $P < 0.05$ ,  $n_c = 16$ ,  $n_{els} = 13$ ; adult:  $t = 1.809$ ,  $P < 0.1$ ,  $n_c = 15$ ,  $n_{els} = 16$ ). Data are z-scored and expressed as means  $\pm$  SEM. \* $P < 0.05$ ; # $P < 0.1$ .



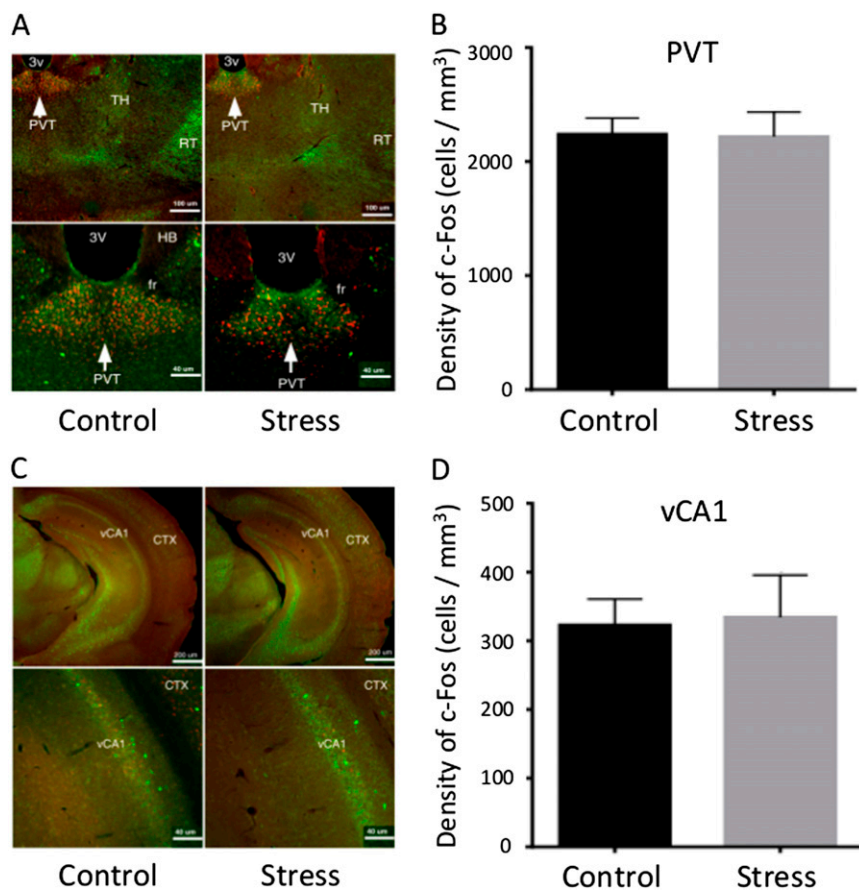

**Fig. 55.** c-Fos expression in paraventricular nucleus of the thalamus (PVT) and ventral hippocampus. (A) Fluorescent double-labeling for c-Fos and parvalbumin (PVA; in green) of a representative slice cut through the PVT of control and early stressed animals. The upper images are magnified at 4 $\times$ , and the lower images are magnified at 10 $\times$ . (B) Quantification of c-Fos labeling in the PVT is not different between experimental groups ( $t = 0.21$ ;  $P = 0.83$ ). (C) Fluorescent double-labeling for c-Fos (red) and PVA (green) of a representative slice cut through ventral cornu ammonis 1 (vCA1) of control and early stressed animals. The upper images are magnified at 2 $\times$ , and the lower images are magnified at 10 $\times$ . (D) Quantification of c-Fos labeling in vCA1 is not different between experimental groups ( $t = 0.38$ ;  $P = 0.71$ ). 3V, third ventricle; CA1, cornu ammonis 1; CTX, cortex; HB, habenula; RT, reticular thalamus; TH, thalamus.

**Table S1. Subject demographics**

| Characteristics                            | Stress                                    | Control                                                       |
|--------------------------------------------|-------------------------------------------|---------------------------------------------------------------|
| Female/male, <i>n</i>                      | 11/5                                      | 7/3                                                           |
| Mean age, y (SD)                           | 8.50 (1.71)                               | 9.20 (1.03)                                                   |
| Mean IQ (SD)                               | 103.33 (13.91)                            | 106.75 (6.13)                                                 |
| CBCL internalizing subscale                | 50.23 (11.28)                             | 36.43 (7.66)                                                  |
| Country of origin                          | 12 China; 2 Ukraine; 1 Cambodia; 1 Russia | 10 United States                                              |
| Ethnic background                          | 13 Asian-American;<br>3 European-American | 1 Asian-American;<br>6 European-American;<br>3 Latin-American |
| Mean age when placed in orphanage, mo (SD) | 1.03 (2.45)                               |                                                               |
| Mean age when adopted, mo (SD)             | 17.06 (10.50)                             |                                                               |
| Mean time with family, mo (SD)             | 85.75 (21.70)                             |                                                               |
| Modal family income range, US dollars      | 150,001–200,000                           | 150,001–200,000                                               |

CBCL, Child Behavior Checklist; IQ, intelligence quotient.
